# Supplementary material for: Iodine Absorption in Celiac Children: A Longitudinal Pilot Study
Source: Nutrients. 2021 Mar 1;13(3):808. doi: 10.3390/nu13030808 (PMC7998751; doi:10.3390/nu13030808)
Supplement: Supplementary file 1 [file nutrients-13-00808-s001.pdf]

**Supplementary table S1.** Characteristics of patients who completed the study vs patients who dropped out.

|                            | <b>Drop out group</b> | <b>Not drop out group</b> |
|----------------------------|-----------------------|---------------------------|
| Age at recruitment (years) | 7.5 (4.6/10.6)        | 7.2 (4.6/9.6)             |
| UIC (mcg/l)                | 59 (44/95)            | 82 (56/105)               |
| TSH (mcg/l)                | 2.27 (1.07/4.07)      | 2.54 (2.02/2.98)          |
| fT4 (ng/dl)                | 1.03 (0.99/1.09)      | 1.05 (0.96/1.53)          |
| fT3 (pg/ml)                | 4.19 (3.62/4.38)      | 4.05 (3.56/4.27)          |
| BMI (SDS)                  | -0.1 (-1.1/0.4)       | -0.4 (-0.9/0.0)           |
